# Supplementary material for: Wine glass size in England from 1700 to 2017: a measure of our time
Source: PubMed Central journal article supplement — BMJ. 2017 Dec 13;359:j5623. doi: 10.1136/bmj.j5623 (PMC5728305; doi:10.1136/bmj.j5623), 2017-12-13
Supplement: mart040677.ww2.pdf [file mart040677.ww2.pdf]

# English wine glass sizes through the ages

In the past 300 years, the size of wine glasses in England has been seen to increase dramatically. By combining measurements of 411 glasses from five sources, Marteau and colleagues have charted the consistent swelling of the mean volume of wine glasses since 1700.

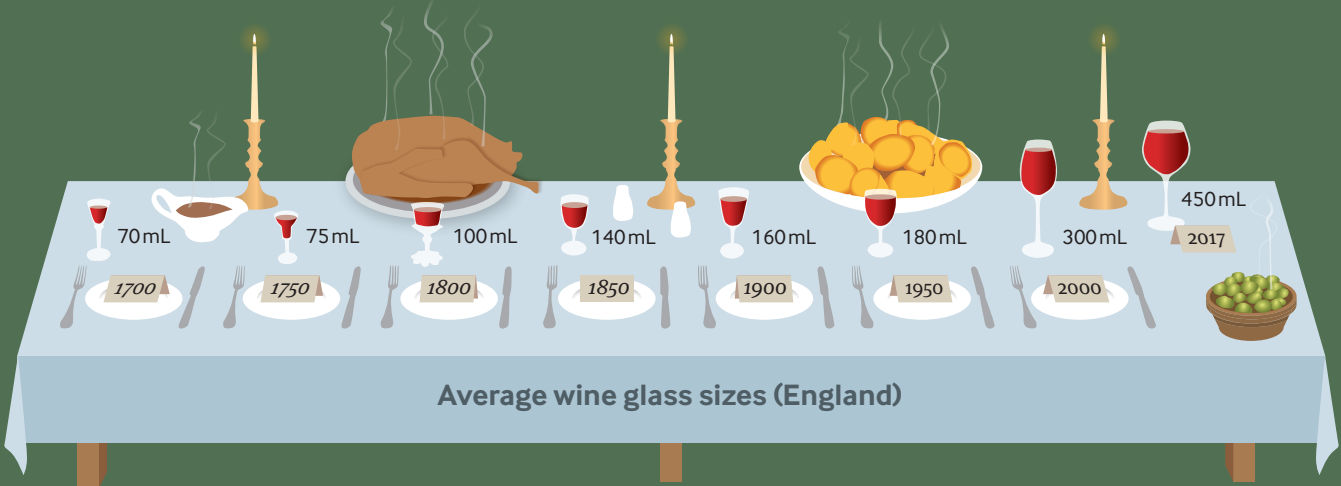

Average wine glass sizes (England)

Measurements from five sources were used because a single source could not be found that captured wine glass size over the period of interest.

Capacity (mL)

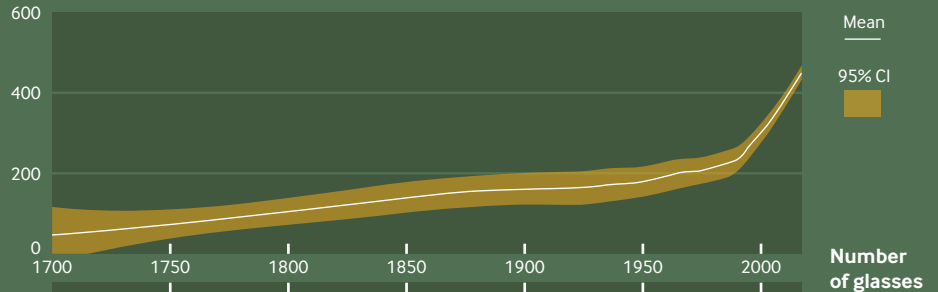

| Source                              | Period    | Number of glasses |
|-------------------------------------|-----------|-------------------|
| Ashmolean Museum, Oxford            | 1700–1800 | 43                |
| Royal Household                     | 1808–1947 | 24                |
| eBay                                | 1840–2016 | 65                |
| Dartington Crystal catalogues       | 1967–2017 | 180               |
| John Lewis department store website | 2016      | 99                |

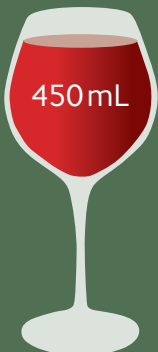

These measurements suggest that today's average wine glass is more than 6 times larger than those available 300 years ago.

The authors suggest that glass size could be contributing to the rise in wine consumption in England, along with other factors such as reduced price, increased availability and marketing.

thebmj Read the full article online

<http://bit.ly/BMJwine>

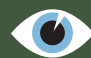

See more visual summaries

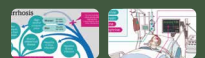

<http://www.bmj.com/infographics>
